# Supplementary material for: Atypical Polycystic Kidney Disease in Individuals Heterozygous for ALG8 Protein-truncating variants
Source: bioRxiv or medRxiv preprint supplement (doi:10.1101/2022.07.13.22277451), 2022-07-18
Supplement: Supplementary file [file media-1.pdf]

**Supplemental Table 1. Characteristics of ALG8 P/LP PTV heterozygotes and matched related non-heterozygotes 30+ years of age with CT or MRI imaging**

|                                         | <b>Heterozygotes<br/>(n=26)</b> | <b>Non-heterozygotes<br/>(n=26)</b> | <b>P value</b> |
|-----------------------------------------|---------------------------------|-------------------------------------|----------------|
| Age at imaging, y                       | 58.0 (16.0)                     | 58.6 (16.2)                         | 0.9            |
| Female, %                               | 15 (57.7)                       | 13 (50.0)                           | 0.8            |
| eGFR available, %                       | 23 (88.5)                       | 26 (100)                            | 0.7            |
| Last eGFR, ml/min/1.73m <sup>2</sup>    | 76.3 (24.0)                     | 73.8 (24.9)                         |                |
| ESKD, %                                 | 0                               | 0                                   | -              |
| Nephrolithiasis, ICD code               | 8 (72.7)                        | 20 (48.8)                           | 0.2            |
| Nephrolithiasis, ICD code or on imaging | 14 (60.9)                       | 14 (48.3)                           | 0.4            |
| Self-reported family hx of PKD          | 1 (3.9)                         | 1 (3.9)                             | 1.0            |
| ADPKD ICD code                          | 0                               | 0                                   | -              |
| Cystic kidney disease ICD code          | 1 (3.9)                         | 1 (3.9)                             | 1.0            |
| Acquired kidney cyst                    | 2 (7.7)                         | 1 (3.9)                             | 1.0            |
| Liver cystic disease ICD code           | 0                               | 0                                   | -              |
| Imaging modality                        |                                 |                                     | 1.0            |
| CT with IV contrast                     | 22 (84.6)                       | 22 (84.6)                           |                |
| CT without IV contrast                  | 3 (11.5)                        | 3 (11.5)                            |                |
| MRI without IV contrast                 | 1 (3.9)                         | 1 (3.9)                             |                |
