# Supplementary material for: Atypical Polycystic Kidney Disease in Individuals Heterozygous for ALG8 Protein-truncating variants
Source: bioRxiv or medRxiv preprint supplement (doi:10.1101/2022.07.13.22277451), 2022-07-18
Supplement: Supplementary file [file media-2.pdf]

**Supplemental Table 2. Kidney and Liver Cystic Phenotypes of *ALG8* P/LP PTV heterozygotes and matched related non-heterozygotes with CT or MRI imaging**

|                                 | <b>All P/LP Variant heterozygotes (n=36)</b> | <b>Related non-heterozygotes (n=24)</b> | <b>P value</b> |
|---------------------------------|----------------------------------------------|-----------------------------------------|----------------|
| ≥ 4 kidney cysts                | 12 (41.4)                                    | 2 (6.9)                                 | 0.005          |
| ≥ 4 kidney cysts or TSTCs       | 19 (65.5)                                    | 5 (17.2)                                | <0.001         |
| Bilateral kidney cysts          | 17 (58.6)                                    | 4 (13.8)                                | 0.001          |
| Bilateral kidney cysts or TSTCs | 21 (72.4)                                    | 7 (24.1)                                | 0.001          |
| Liver cysts                     | 2 (6.9)                                      | 2 (6.9)                                 | 1.0            |
| Liver cysts or TSTCs            | 8 (27.6)                                     | 4 (13.8)                                | 0.3            |
| Nephrolithiasis                 | 14 (48.3)                                    | 9 (31.0)                                | 0.3            |

Heterozygotes were matched 1:1 to individuals in the non-heterozygote relative cohort by age sextile, sex, and imaging modality (CT with IV contrast (n=25 pairs); CT without IV contrast (n=4 pairs))
