# Supplementary material for: Atypical Polycystic Kidney Disease in Individuals Heterozygous for ALG8 Protein-truncating variants
Source: bioRxiv or medRxiv preprint supplement (doi:10.1101/2022.07.13.22277451), 2022-07-18
Supplement: Supplementary file [file media-3.pdf]

**Supplemental Table 3. Kidney and Liver Cystic Phenotypes of ALG8 P/LP PTV heterozygotes with CT or MRI imaging, by Variant**

|                                 | <b>p.Arg364Ter</b><br>Age ≥30: n=34<br>Age <30: n=4                                                  | <b>p.Arg179Ter</b><br>Age ≥30: n=2<br>Age <30: n=1 | <b>p.Arg41Ter</b><br>Age ≥30: n=5<br>Age <30: n=0 | <b>c.368+T2&gt;G</b><br>Age ≥30: 1<br>Age <30: 0  |
|---------------------------------|------------------------------------------------------------------------------------------------------|----------------------------------------------------|---------------------------------------------------|---------------------------------------------------|
| Consequence                     | Stop-gained                                                                                          | Stop-gained                                        | Stop-gained                                       | Splice donor                                      |
| Clinvar classification          | Pathogenic<br>8 submission<br>2 stars                                                                | Pathogenic<br>1 submission<br>0 stars              | Pathogenic<br>3 submissions<br>2 stars            | Likely pathogenic<br>1 submission<br>1 star       |
| Conditions listed in Clinvar    | Polycystic liver disease 3 with kidney cysts (AD); Congenital disorder of glycosylation type 1H (AR) | Polycystic liver disease 3 with kidney cysts (AD)  | Congenital disorder of glycosylation type 1H (AR) | Congenital disorder of glycosylation type 1H (AR) |
| ≥ 4 kidney cysts                | Age ≥30: 18/34 (52.9%)<br>Age <30: 1/4 (25%)                                                         | Age ≥30: 0/2<br>Age <30: 0/1                       | Age ≥30: 2/5 (60%)                                | Age ≥30: 1/1 (100%)                               |
| ≥ 4 kidney cysts or TSTCs       | Age ≥30: 25/34 (73.5%)<br>Age <30: 2/4 (50%)                                                         | Age ≥30: 2/2 (100%)<br>Age <30: 0/1 (0%)           | Age ≥30: 3/5 (60%)                                | Age ≥30: 1/1 (100%)                               |
| Bilateral kidney cysts          | Age ≥30: 23/34 (67.7%)<br>Age <30: 2/4 (50%)                                                         | Age ≥30: 1/2 (50%)<br>Age <30: 0/1                 | Age ≥30: 3/5 (60%)                                | Age ≥30: 1/1 (100%)                               |
| Bilateral kidney cysts or TSTCs | Age ≥30: 27/34 (79.4%)<br>Age <30: 2/4 (50%)                                                         | Age ≥30: 2/2 (100%)<br>Age <30: 1/1 (100%)         | Age ≥30: 4/5 (80%)                                | Age ≥30: 1/1 (100%)                               |
| Liver cysts                     | Age ≥30: 3/34 (8.8%)<br>Age <30: 0/4                                                                 | Age ≥30: 0/2<br>Age <30: 0/1                       | Age ≥30: 1/5 (20%)                                | Age ≥30: 1/1 (100%)                               |

|                      |                                              |                              |                    |                     |
|----------------------|----------------------------------------------|------------------------------|--------------------|---------------------|
| Liver cysts or TSTCs | Age ≥30: 10/34 (29.4%)<br>Age <30: 1/4 (25%) | Age ≥30: 0/2<br>Age <30: 0/1 | Age ≥30: 1/5 (20%) | Age ≥30: 1/1 (100%) |
| Nephrolithiasis      | Age ≥30: 18/34 (52.9%)<br>Age <30: 1/4 (25%) | Age ≥30: 0/2<br>Age <30: 0/1 | Age ≥30: 3/5 (60%) | Age ≥30: 1/1 (100%) |

This table only includes families where a proband had imaging (complete US, CT, or MRI) above the age of 20.
